# Supplementary material for: Investigating the procurement system for understanding seasonal influenza vaccine brand availability in Europe
Source: PLOS journal article supplement (doi:10.1371/journal.pone.0248943), 2021-04-08
Supplement: S2 (10.1371/journal.pone.0248943.s002) [file journal.pone.0248943.s002]

*On behalf of myself as the rights' holder, I hereby grant permission to use a map created with MapChart ([mapchart.net](http://mapchart.net)) for a publication in a PLOS journal under a Creative Commons Attribution License (CCAL) CC BY 4.0 (<http://creativecommons.org/licenses/by/4.0/>).*

*Minas Giannakas, owner of the map-making website MapChart ([mapchart.net](http://mapchart.net))*

A handwritten signature in black ink, consisting of several loops and a horizontal line at the bottom.

*26 January 2021*
